# Supplementary material for: Heterologous Hsp90 promotes phenotypic diversity through network evolution
Source: PLoS Biol. 2018 Nov 15;16(11):e2006450. doi: 10.1371/journal.pbio.2006450 (PMC6264905; doi:10.1371/journal.pbio.2006450)
Supplement: S7 Table — (XLSX) [file pbio.2006450.s015.xlsx]

## Sheet: Sheet1
Chr XII													mitochondria													Chr others
CNV identified in Evolved clones	Systematic Name	Standard Name	Copy number in evolved clone	Copyn number in ancestor	Copy number difference, threshold = 0.8	Fold change	Chrmosome	Category	Start	Stop			CNV identified in Evolved clones	Systematic Name	Standard Name	Copy number in evolved clone	Copyn number in ancestor	Copy number difference, threshold = 0.8	Fold change	Chrmosome	Category	Start	Stop			CNV identified in Evolved clones	Systematic Name	Standard Name	Copy number in evolved clone	Copyn number in ancestor	Copy number difference, threshold = 0.8	Fold change	Chrmosome	Category	Start	Stop
E3	ETS1-1	ETS1-1	109.715	54.8208	54.894	2.00134	chrXII	rRNA_gene	457733	458432			E3	Q0020	15S_RRNA	26.0619	22.5543	3.50766	1.15552	chrmt	rRNA_gene	6546	8194			E4	YDR545W	YRF1-1	2.85664	1.75417	1.10247	1.62848	chrIV	gene	1526321	1531711	Helicase encoded by the Y' element of subtelomeric regions
E3	ETS1-2	ETS1-2	110.69	54.7745	55.9154	2.02083	chrXII	rRNA_gene	466870	467569			E3	Q0045	COX1	19.2088	18.3661	0.84271	1.04588	chrmt	gene	13818	26701			E4	tE(CUC)I	tE(CUC)I	2.63222	1.76711	0.865104	1.48956	chrIX	tRNA_gene	197592	197663	Glutamate tRNA (tRNA-Glu)
E3	ETS2-1	ETS2-1	60.3082	29.7618	30.5464	2.02636	chrXII	rRNA_gene	451575	451785			E3	Q0050	AI1	17.0432	18.5326	-1.48944	0.919631	chrmt	gene	13818	16322			E4	YOR396W	YRF1-8	3.02633	1.67144	1.35488	1.81061	chrXV	gene	1085473	1090863	Telomeric Y' element-encoded DNA helicases
E3	ETS2-2	ETS2-2	124.772	60.748	64.0237	2.05392	chrXII	rRNA_gene	460712	460922			E3	Q0055	AI2	19.0967	20.106	-1.00927	0.949803	chrmt	gene	13818	18830			E5	YFL064C	YFL064C	1.84445	1.0337	0.810744	1.78431	chrVI	gene	3322	3846
E3	ITS1-1	ITS1-1	116.404	56.5206	59.8832	2.05949	chrXII	rRNA_gene	455572	455932			E3	Q0075	AI5_BETa	26.2627	20.0915	6.1712	1.30715	chrmt	gene	24156	25255			E5	YFL065C	YFL065C	1.74125	0.919167	0.822079	1.89437	chrVI	gene	3030	3338	Putative protein of unknown function
E3	ITS1-2	ITS1-2	117.021	57.031	59.9899	2.05188	chrXII	rRNA_gene	464709	465069			E3	Q0080	ATP8	4.41695	3.34516	1.07179	1.3204	chrmt	gene	27666	27812			E5	YFL066C	YFL066C	1.86595	0.877107	0.988847	2.1274	chrVI	gene	1437	2615	Helicase-like protein encoded within the telomeric Y' element
E3	ITS2-1	ITS2-1	112.153	56.0598	56.0928	2.00059	chrXII	rRNA_gene	455182	455413			E3	Q0085	ATP6	18.5542	17.0533	1.50095	1.08802	chrmt	gene	28487	29266			E5	YFL067W	YFL067W	1.84362	0.927167	0.916451	1.98844	chrVI	gene	836	1363
E3	ITS2-2	ITS2-2	111.893	56.9066	54.9868	1.96626	chrXII	rRNA_gene	464319	464550			E3	Q0130	OLI1	15.725	13.832	1.89299	1.13686	chrmt	gene	46723	46953			E8	YIL153W	RRD1	2.56605	1.72824	0.837806	1.48477	chrIX	gene	55198	56379	Subunit of the Tap42p-Sit4p-Rrd1p complex, G1 phase progression, microtubule dynamics, bud morphogenesis and DNA repair
E3	RDN18-1	RDN18-1	113.395	53.9649	59.4299	2.10127	chrXII	rRNA_gene	455933	457732			E3	Q0140	VAR1	10.8784	7.65481	3.22356	1.42112	chrmt	gene	48901	50097			E8	YIL154C	IMP2'	2.42443	1.40195	1.02247	1.72932	chrIX	gene	53981	55021	TF, maintenance of ion homeostasis, required for glucose repression
E3	RDN18-2	RDN18-2	113.092	53.766	59.3257	2.10341	chrXII	rRNA_gene	465070	466869			E3	Q0158	21S_RRNA	20.5644	19.3613	1.2031	1.06214	chrmt	rRNA_gene	58009	62447
E3	RDN25-1	RDN25-1	108.719	51.0944	57.6244	2.1278	chrXII	rRNA_gene	451786	455181			E3	Q0160	SCEi	15.9685	17.3951	-1.42659	0.917989	chrmt	gene	61022	61729
E3	RDN25-2	RDN25-2	110.017	51.1795	58.8375	2.14963	chrXII	rRNA_gene	460923	464318			E3	Q0255	Q0255	19.931	17.5824	2.34864	1.13358	chrmt	gene	74495	75984
E3	RDN37-1	RDN37-1	109.309	52.2209	57.0882	2.09321	chrXII	rRNA_gene	451575	458432			E3	Q0275	COX3	27.9437	24.3462	3.59743	1.14776	chrmt	gene	79213	80022
E3	RDN37-2	RDN37-2	112.029	53.2394	58.7896	2.10425	chrXII	rRNA_gene	460712	467569			E3	Q0020	15S_RRNA	26.0619	22.5543	3.50766	1.15552	chrmt	rRNA_gene	6546	8194
E3	RDN5-1	RDN5-1	90.9977	46.6898	44.308	1.94899	chrXII	rRNA_gene	459676	459796			E3	Q0045	COX1	19.2088	18.3661	0.84271	1.04588	chrmt	gene	13818	26701
E3	RDN5-2	RDN5-2	11.7074	5.8685	5.83888	1.99495	chrXII	rRNA_gene	468813	468931			E3	Q0050	AI1	17.0432	18.5326	-1.48944	0.919631	chrmt	gene	13818	16322
E3	RDN58-1	RDN58-1	114.54	57.5172	57.0231	1.99141	chrXII	rRNA_gene	455414	455571			E3	Q0055	AI2	19.0967	20.106	-1.00927	0.949803	chrmt	gene	13818	18830
E3	RDN58-2	RDN58-2	116.424	58.4277	57.996	1.99261	chrXII	rRNA_gene	464551	464708			E3	Q0075	AI5_BETa	26.2627	20.0915	6.1712	1.30715	chrmt	gene	24156	25255
E3	YLR154C-G	YLR154C-G	111.733	51.4806	60.2522	2.17039	chrXII	gene	462522	462671			E3	Q0080	ATP8	4.41695	3.34516	1.07179	1.3204	chrmt	gene	27666	27812
E3	YLR154C-H	YLR154C-H	8.45766	4.38304	4.07462	1.92963	chrXII	gene	468827	468958			E3	Q0085	ATP6	18.5542	17.0533	1.50095	1.08802	chrmt	gene	28487	29266
E3	YLR154W-C	TAR1	108.52	53.3856	55.1349	2.03277	chrXII	gene	454696	455070			E3	Q0130	OLI1	15.725	13.832	1.89299	1.13686	chrmt	gene	46723	46953
E4	ETS1-1	ETS1-1	99.687	54.8208	44.8661	1.81841	chrXII	rRNA_gene	457733	458432			E3	Q0140	VAR1	10.8784	7.65481	3.22356	1.42112	chrmt	gene	48901	50097
E4	ETS1-2	ETS1-2	100.185	54.7745	45.4102	1.82904	chrXII	rRNA_gene	466870	467569			E3	Q0158	21S_RRNA	20.5644	19.3613	1.2031	1.06214	chrmt	rRNA_gene	58009	62447
E4	ETS2-1	ETS2-1	55.9529	29.7618	26.1912	1.88003	chrXII	rRNA_gene	451575	451785			E3	Q0160	SCEi	15.9685	17.3951	-1.42659	0.917989	chrmt	gene	61022	61729
E4	ETS2-2	ETS2-2	116.202	60.748	55.4536	1.91285	chrXII	rRNA_gene	460712	460922			E3	Q0255	Q0255	19.931	17.5824	2.34864	1.13358	chrmt	gene	74495	75984
E4	ITS1-1	ITS1-1	107.986	56.5206	51.465	1.91055	chrXII	rRNA_gene	455572	455932			E3	Q0275	COX3	27.9437	24.3462	3.59743	1.14776	chrmt	gene	79213	80022
E4	ITS1-2	ITS1-2	106.5	57.031	49.4691	1.86741	chrXII	rRNA_gene	464709	465069			E3	tA(UGC)Q	tA(UGC)Q	17.969	15.0273	2.94169	1.19576	chrmt	tRNA_gene	69846	69921
E4	ITS2-1	ITS2-1	105.291	56.0598	49.2309	1.87819	chrXII	rRNA_gene	455182	455413			E3	tC(GCA)Q	tC(GCA)Q	25.4851	18.5891	6.89601	1.37097	chrmt	tRNA_gene	64415	64490
E4	ITS2-2	ITS2-2	107.268	56.9066	50.3616	1.88499	chrXII	rRNA_gene	464319	464550			E3	tD(GUC)Q	tD(GUC)Q	23.5163	18.4132	5.10306	1.27714	chrmt	tRNA_gene	68322	68396
E4	RDN18-1	RDN18-1	105.391	53.9649	51.4259	1.95295	chrXII	rRNA_gene	455933	457732			E3	tE(UUC)Q	tE(UUC)Q	20.12	15.5854	4.53464	1.29095	chrmt	tRNA_gene	35373	35444
E4	RDN18-2	RDN18-2	104.379	53.766	50.6128	1.94135	chrXII	rRNA_gene	465070	466869			E3	tF(GAA)Q	tF(GAA)Q	19.902	15.2611	4.6409	1.3041	chrmt	tRNA_gene	77431	77505
E4	RDN25-1	RDN25-1	99.372	51.0944	48.2775	1.94487	chrXII	rRNA_gene	451786	455181			E3	tG(UCC)Q	tG(UCC)Q	16.1953	13.944	2.25134	1.16146	chrmt	tRNA_gene	67468	67542
E4	RDN25-2	RDN25-2	100.838	51.1795	49.6585	1.97028	chrXII	rRNA_gene	460923	464318			E3	tH(GUG)Q	tH(GUG)Q	26.5652	20.6125	5.95271	1.28879	chrmt	tRNA_gene	64596	64670
E4	RDN37-1	RDN37-1	100.619	52.2209	48.3984	1.9268	chrXII	rRNA_gene	451575	458432			E3	tI(GAU)Q	tI(GAU)Q	16.5749	14.6755	1.89938	1.12943	chrmt	tRNA_gene	70162	70237
E4	RDN37-2	RDN37-2	102.967	53.2394	49.7278	1.93404	chrXII	rRNA_gene	460712	467569			E3	tK(UUU)Q	tK(UUU)Q	25.9407	20.0502	5.89052	1.29379	chrmt	tRNA_gene	67061	67134
E4	RDN5-1	RDN5-1	87.4282	46.6898	40.7384	1.87253	chrXII	rRNA_gene	459676	459796			E3	tL(UAA)Q	tL(UAA)Q	24.4878	17.1936	7.29419	1.42424	chrmt	tRNA_gene	66095	66179
E4	RDN5-2	RDN5-2	11.3284	5.8685	5.45991	1.93038	chrXII	rRNA_gene	468813	468931			E3	tM(CAU)Q1	tM(CAU)Q1	20.7777	14.5257	6.25193	1.4304	chrmt	tRNA_gene	72630	72705
E4	RDN58-1	RDN58-1	109.297	57.5172	51.7799	1.90025	chrXII	rRNA_gene	455414	455571			E3	tM(CAU)Q2	tM(CAU)Q2	13.1871	8.51555	4.67159	1.54859	chrmt	tRNA_gene	85035	85112
E4	RDN58-2	RDN58-2	108.77	58.4277	50.3424	1.86162	chrXII	rRNA_gene	464551	464708			E3	tN(GUU)Q	tN(GUU)Q	16.0374	11.1135	4.92393	1.44306	chrmt	tRNA_gene	71433	71503
E4	YLL066C	YLL066C	3.35534	1.03945	2.31589	3.228	chrXII	gene	6120	9836			E3	tP(UGG)Q	tP(UGG)Q	31.5024	23.8303	7.67208	1.32195	chrmt	tRNA_gene	731	802
E4	YLL066W-B	YLL066W-B	4.44822	0.986742	3.46148	4.50799	chrXII	gene	5605	5775			E3	tQ(UUG)Q	tQ(UUG)Q	18.3233	12.7207	5.60263	1.44043	chrmt	tRNA_gene	66210	66285
E4	YLL067C	YLL067C	1.90526	0.847119	1.05814	2.2491	chrXII	gene	585	4301			E3	tR(ACG)Q2	tR(ACG)Q2	28.9889	22.2589	6.73006	1.30235	chrmt	tRNA_gene	69289	69362
E4	YLR154C-G	YLR154C-G	102.501	51.4806	51.0208	1.99107	chrXII	gene	462522	462671			E3	tR(UCU)Q1	tR(UCU)Q1	17.4407	15.4287	2.01202	1.13041	chrmt	tRNA_gene	67309	67381
E4	YLR154C-H	YLR154C-H	8.22485	4.38304	3.84181	1.87652	chrXII	gene	468827	468958			E3	tS(GCU)Q1	tS(GCU)Q1	28.4832	21.815	6.6681	1.30567	chrmt	tRNA_gene	69203	69288
E4	YLR154W-C	TAR1	103.112	53.3856	49.7264	1.93146	chrXII	gene	454696	455070			E3	tS(UGA)Q2	tS(UGA)Q2	28.6898	21.6046	7.08522	1.32795	chrmt	tRNA_gene	48201	48290
E4	YLR467W	YRF1-5	2.8661	1.7931	1.073	1.5984	chrXII	gene	1072508	1077898			E3	tT(UAG)Q2	tT(UAG)Q2	11.4709	9.04199	2.4289	1.26862	chrmt	tRNA_gene	78089	78162
E5	ETS1-1	ETS1-1	86.1422	54.8208	31.3214	1.57134	chrXII	rRNA_gene	457733	458432			E3	tT(UGU)Q1	tT(UGU)Q1	14.5792	11.4368	3.14231	1.27475	chrmt	tRNA_gene	63862	63937
E5	ETS1-2	ETS1-2	85.85	54.7745	31.0755	1.56734	chrXII	rRNA_gene	466870	467569			E3	tV(UAC)Q	tV(UAC)Q	5.39264	4.13098	1.26166	1.30541	chrmt	tRNA_gene	78533	78608
E5	ETS2-1	ETS2-1	46.7089	29.7618	16.9471	1.56943	chrXII	rRNA_gene	451575	451785			E3	tW(UCA)Q	tW(UCA)Q	19.0972	13.9731	5.12411	1.36671	chrmt	tRNA_gene	9374	9447
E5	ETS2-2	ETS2-2	90.8299	60.748	30.0819	1.49519	chrXII	rRNA_gene	460712	460922			E3	tY(GUA)Q	tY(GUA)Q	22.6404	18.9696	3.67082	1.19351	chrmt	tRNA_gene	70824	70907
E5	ITS1-1	ITS1-1	87.2505	56.5206	30.73	1.5437	chrXII	rRNA_gene	455572	455932			E4	Q0020	15S_RRNA	24.1794	22.5543	1.62512	1.07205	chrmt	rRNA_gene	6546	8194
E5	ITS1-2	ITS1-2	86.9528	57.031	29.9218	1.52466	chrXII	rRNA_gene	464709	465069			E4	Q0045	COX1	19.3764	18.3661	1.01037	1.05501	chrmt	gene	13818	26701
E5	ITS2-1	ITS2-1	87.0731	56.0598	31.0134	1.55322	chrXII	rRNA_gene	455182	455413			E4	Q0075	AI5_BETa	23.3552	20.0915	3.26372	1.16244	chrmt	gene	24156	25255
E5	ITS2-2	ITS2-2	85.3001	56.9066	28.3936	1.49895	chrXII	rRNA_gene	464319	464550			E4	Q0085	ATP6	18.9604	17.0533	1.90714	1.11183	chrmt	gene	28487	29266
E5	RDN18-1	RDN18-1	83.5011	53.9649	29.5362	1.54732	chrXII	rRNA_gene	455933	457732			E4	Q0105	COb	15.2473	12.9339	2.31346	1.17887	chrmt	gene	36540	43647
E5	RDN18-2	RDN18-2	82.4916	53.766	28.7256	1.53427	chrXII	rRNA_gene	465070	466869			E4	Q0110	BI2	13.6466	11.0908	2.5558	1.23044	chrmt	gene	36540	38579
E5	RDN25-1	RDN25-1	79.6266	51.0944	28.5321	1.55842	chrXII	rRNA_gene	451786	455181			E4	Q0115	BI3	11.5887	8.90451	2.68415	1.30144	chrmt	gene	36540	40265
E5	RDN25-2	RDN25-2	80.308	51.1795	29.1285	1.56914	chrXII	rRNA_gene	460923	464318			E4	Q0120	BI4	13.9501	11.5864	2.36372	1.20401	chrmt	gene	36540	42251
E5	RDN37-1	RDN37-1	81.2332	52.2209	29.0124	1.55557	chrXII	rRNA_gene	451575	458432			E4	Q0130	OLI1	14.9973	13.832	1.16524	1.08424	chrmt	gene	46723	46953
E5	RDN37-2	RDN37-2	82.5709	53.2394	29.3316	1.55094	chrXII	rRNA_gene	460712	467569			E4	Q0140	VAR1	8.97067	7.65481	1.31586	1.1719	chrmt	gene	48901	50097
E5	RDN5-1	RDN5-1	70.9716	46.6898	24.2819	1.52007	chrXII	rRNA_gene	459676	459796			E4	Q0158	21S_RRNA	21.4671	19.3613	2.10583	1.10876	chrmt	rRNA_gene	58009	62447
E5	RDN5-2	RDN5-2	9.21004	5.8685	3.34154	1.5694	chrXII	rRNA_gene	468813	468931			E4	Q0255	Q0255	20.8565	17.5824	3.27414	1.18622	chrmt	gene	74495	75984
E5	RDN58-1	RDN58-1	88.765	57.5172	31.2478	1.54328	chrXII	rRNA_gene	455414	455571			E4	Q0275	COX3	25.797	24.3462	1.45076	1.05959	chrmt	gene	79213	80022
E5	RDN58-2	RDN58-2	89.2081	58.4277	30.7804	1.52681	chrXII	rRNA_gene	464551	464708			E4	tA(UGC)Q	tA(UGC)Q	17.6626	15.0273	2.63535	1.17537	chrmt	tRNA_gene	69846	69921
E5	YLR154C-G	YLR154C-G	80.8357	51.4806	29.3551	1.57022	chrXII	gene	462522	462671			E4	tC(GCA)Q	tC(GCA)Q	21.5174	18.5891	2.92826	1.15753	chrmt	tRNA_gene	64415	64490
E5	YLR154C-H	YLR154C-H	6.74547	4.38304	2.36243	1.53899	chrXII	gene	468827	468958			E4	tD(GUC)Q	tD(GUC)Q	22.409	18.4132	3.99582	1.21701	chrmt	tRNA_gene	68322	68396
E5	YLR154W-C	TAR1	81.3181	53.3856	27.9326	1.52322	chrXII	gene	454696	455070			E4	tE(UUC)Q	tE(UUC)Q	17.7228	15.5854	2.13743	1.13714	chrmt	tRNA_gene	35373	35444
E6	ETS1-1	ETS1-1	83.7967	54.8208	28.9759	1.52856	chrXII	rRNA_gene	457733	458432			E4	tF(GAA)Q	tF(GAA)Q	18.4127	15.2611	3.1516	1.20651	chrmt	tRNA_gene	77431	77505
E6	ETS1-2	ETS1-2	83.5998	54.7745	28.8253	1.52625	chrXII	rRNA_gene	466870	467569			E4	tG(UCC)Q	tG(UCC)Q	15.9122	13.944	1.96823	1.14115	chrmt	tRNA_gene	67468	67542
E6	ETS2-1	ETS2-1	42.6528	29.7618	12.891	1.43314	chrXII	rRNA_gene	451575	451785			E4	tH(GUG)Q	tH(GUG)Q	22.8979	20.6125	2.28542	1.11088	chrmt	tRNA_gene	64596	64670
E6	ETS2-2	ETS2-2	86.2346	60.748	25.4866	1.41955	chrXII	rRNA_gene	460712	460922			E4	tI(GAU)Q	tI(GAU)Q	17.2609	14.6755	2.58544	1.17617	chrmt	tRNA_gene	70162	70237
E6	ITS1-1	ITS1-1	84.4548	56.5206	27.9343	1.49423	chrXII	rRNA_gene	455572	455932			E4	tK(UUU)Q	tK(UUU)Q	26.4786	20.0502	6.42845	1.32062	chrmt	tRNA_gene	67061	67134
E6	ITS1-2	ITS1-2	84.0535	57.031	27.0225	1.47382	chrXII	rRNA_gene	464709	465069			E4	tL(UAA)Q	tL(UAA)Q	21.9923	17.1936	4.79867	1.2791	chrmt	tRNA_gene	66095	66179
E6	ITS2-1	ITS2-1	83.0163	56.0598	26.9565	1.48085	chrXII	rRNA_gene	455182	455413			E4	tM(CAU)Q1	tM(CAU)Q1	18.879	14.5257	4.35323	1.29969	chrmt	tRNA_gene	72630	72705
E6	ITS2-2	ITS2-2	81.9907	56.9066	25.0841	1.44079	chrXII	rRNA_gene	464319	464550			E4	tM(CAU)Q2	tM(CAU)Q2	11.7027	8.51555	3.18715	1.37427	chrmt	tRNA_gene	85035	85112
E6	RDN18-1	RDN18-1	80.2977	53.9649	26.3328	1.48796	chrXII	rRNA_gene	455933	457732			E4	tN(GUU)Q	tN(GUU)Q	15.5708	11.1135	4.45732	1.40107	chrmt	tRNA_gene	71433	71503
E6	RDN18-2	RDN18-2	80.3648	53.766	26.5988	1.49471	chrXII	rRNA_gene	465070	466869			E4	tP(UGG)Q	tP(UGG)Q	27.5978	23.8303	3.76749	1.1581	chrmt	tRNA_gene	731	802
E6	RDN25-1	RDN25-1	75.5661	51.0944	24.4717	1.47895	chrXII	rRNA_gene	451786	455181			E4	tQ(UUG)Q	tQ(UUG)Q	15.9942	12.7207	3.27347	1.25733	chrmt	tRNA_gene	66210	66285
E6	RDN25-2	RDN25-2	76.4235	51.1795	25.244	1.49324	chrXII	rRNA_gene	460923	464318			E4	tR(ACG)Q2	tR(ACG)Q2	26.6622	22.2589	4.40329	1.19782	chrmt	tRNA_gene	69289	69362
E6	RDN37-1	RDN37-1	77.6358	52.2209	25.4149	1.48668	chrXII	rRNA_gene	451575	458432			E4	tR(UCU)Q1	tR(UCU)Q1	18.1135	15.4287	2.6848	1.17401	chrmt	tRNA_gene	67309	67381
E6	RDN37-2	RDN37-2	79.3801	53.2394	26.1407	1.491	chrXII	rRNA_gene	460712	467569			E4	tS(GCU)Q1	tS(GCU)Q1	27.0669	21.815	5.25184	1.24074	chrmt	tRNA_gene	69203	69288
E6	RDN5-1	RDN5-1	68.4782	46.6898	21.7885	1.46667	chrXII	rRNA_gene	459676	459796			E4	tS(UGA)Q2	tS(UGA)Q2	27.5868	21.6046	5.98221	1.27689	chrmt	tRNA_gene	48201	48290
E6	RDN5-2	RDN5-2	8.89942	5.8685	3.03092	1.51647	chrXII	rRNA_gene	468813	468931			E4	tT(UAG)Q2	tT(UAG)Q2	12.089	9.04199	3.04697	1.33698	chrmt	tRNA_gene	78089	78162
E6	RDN58-1	RDN58-1	84.6932	57.5172	27.176	1.47248	chrXII	rRNA_gene	455414	455571			E4	tT(UGU)Q1	tT(UGU)Q1	15.0701	11.4368	3.63325	1.31768	chrmt	tRNA_gene	63862	63937
E6	RDN58-2	RDN58-2	86.1283	58.4277	27.7006	1.4741	chrXII	rRNA_gene	464551	464708			E4	tV(UAC)Q	tV(UAC)Q	6.40702	4.13098	2.27604	1.55097	chrmt	tRNA_gene	78533	78608
E6	YLR154C-G	YLR154C-G	76.2937	51.4806	24.8131	1.48199	chrXII	gene	462522	462671			E4	tW(UCA)Q	tW(UCA)Q	17.207	13.9731	3.23388	1.23144	chrmt	tRNA_gene	9374	9447
E6	YLR154C-H	YLR154C-H	6.55304	4.38304	2.17	1.49509	chrXII	gene	468827	468958			E4	tY(GUA)Q	tY(GUA)Q	20.6766	18.9696	1.70709	1.08999	chrmt	tRNA_gene	70824	70907
E6	YLR154W-C	TAR1	79.3801	53.3856	25.9945	1.48692	chrXII	gene	454696	455070			E5	Q0020	15S_RRNA	28.3718	22.5543	5.81753	1.25794	chrmt	rRNA_gene	6546	8194
E7	ETS1-1	ETS1-1	52.0391	54.8208	-2.78173	0.949258	chrXII	rRNA_gene	457733	458432			E5	Q0045	COX1	21.8537	18.3661	3.48768	1.1899	chrmt	gene	13818	26701
E7	ETS1-2	ETS1-2	52.6664	54.7745	-2.10814	0.961512	chrXII	rRNA_gene	466870	467569			E5	Q0050	AI1	20.2563	18.5326	1.72364	1.09301	chrmt	gene	13818	16322
E7	ETS2-2	ETS2-2	57.9011	60.748	-2.84687	0.953136	chrXII	rRNA_gene	460712	460922			E5	Q0055	AI2	21.8079	20.106	1.7019	1.08465	chrmt	gene	13818	18830
E7	ITS1-1	ITS1-1	54.5078	56.5206	-2.01277	0.964389	chrXII	rRNA_gene	455572	455932			E5	Q0060	AI3	22.1535	20.0364	2.11712	1.10566	chrmt	gene	13818	19996
E7	ITS1-2	ITS1-2	55.9574	57.031	-1.07364	0.981174	chrXII	rRNA_gene	464709	465069			E5	Q0065	AI4	22.8604	20.2735	2.58687	1.1276	chrmt	gene	13818	21935
E7	ITS2-1	ITS2-1	54.1216	56.0598	-1.93817	0.965427	chrXII	rRNA_gene	455182	455413			E5	Q0070	AI5_ALPHa	21.5141	18.8276	2.68648	1.14269	chrmt	gene	13818	23167
E7	ITS2-2	ITS2-2	52.8094	56.9066	-4.09718	0.928002	chrXII	rRNA_gene	464319	464550			E5	Q0075	AI5_BETa	26.2865	20.0915	6.19494	1.30834	chrmt	gene	24156	25255
E7	RDN18-1	RDN18-1	53.0641	53.9649	-0.900788	0.983308	chrXII	rRNA_gene	455933	457732			E5	Q0080	ATP8	5.54303	3.34516	2.19787	1.65703	chrmt	gene	27666	27812
E7	RDN37-1	RDN37-1	51.0939	52.2209	-1.12698	0.978419	chrXII	rRNA_gene	451575	458432			E5	Q0085	ATP6	21.3452	17.0533	4.29193	1.25168	chrmt	gene	28487	29266
E7	RDN37-2	RDN37-2	52.4093	53.2394	-0.830043	0.984409	chrXII	rRNA_gene	460712	467569			E5	Q0105	COb	17.1751	12.9339	4.24121	1.32792	chrmt	gene	36540	43647
E7	RDN5-1	RDN5-1	43.0517	46.6898	-3.63801	0.922081	chrXII	rRNA_gene	459676	459796			E5	Q0110	BI2	15.0871	11.0908	3.99634	1.36033	chrmt	gene	36540	38579
E7	RDN58-1	RDN58-1	55.4313	57.5172	-2.08594	0.963734	chrXII	rRNA_gene	455414	455571			E5	Q0115	BI3	13.1146	8.90451	4.21007	1.4728	chrmt	gene	36540	40265
E7	RDN58-2	RDN58-2	54.2827	58.4277	-4.14502	0.929057	chrXII	rRNA_gene	464551	464708			E5	Q0120	BI4	15.649	11.5864	4.06257	1.35063	chrmt	gene	36540	42251
E7	YLR154C-G	YLR154C-G	52.6204	51.4806	1.1398	1.02214	chrXII	gene	462522	462671			E5	Q0130	OLI1	20.2055	13.832	6.3735	1.46078	chrmt	gene	46723	46953
E7	YLR154W-C	TAR1	51.6815	53.3856	-1.70407	0.96808	chrXII	gene	454696	455070			E5	Q0140	VAR1	11.3191	7.65481	3.66427	1.47869	chrmt	gene	48901	50097
E8	ETS1-1	ETS1-1	64.4033	54.8208	9.5825	1.1748	chrXII	rRNA_gene	457733	458432			E5	Q0158	21S_RRNA	23.9682	19.3613	4.60684	1.23794	chrmt	rRNA_gene	58009	62447
E8	ETS1-2	ETS1-2	64.6981	54.7745	9.92358	1.18117	chrXII	rRNA_gene	466870	467569			E5	Q0160	SCEi	20.2132	17.3951	2.81816	1.16201	chrmt	gene	61022	61729
E8	ETS2-1	ETS2-1	44.3304	29.7618	14.5686	1.48951	chrXII	rRNA_gene	451575	451785			E5	Q0250	COX2	28.0451	24.0131	4.03194	1.16791	chrmt	gene	73758	74513
E8	ETS2-2	ETS2-2	82.4593	60.748	21.7113	1.3574	chrXII	rRNA_gene	460712	460922			E5	Q0255	Q0255	21.8237	17.5824	4.24135	1.24123	chrmt	gene	74495	75984
E8	ITS1-1	ITS1-1	70.7002	56.5206	14.1796	1.25088	chrXII	rRNA_gene	455572	455932			E5	Q0275	COX3	28.6906	24.3462	4.34437	1.17844	chrmt	gene	79213	80022
E8	ITS1-2	ITS1-2	69.8395	57.031	12.8085	1.22459	chrXII	rRNA_gene	464709	465069			E5	tA(UGC)Q	tA(UGC)Q	20.189	15.0273	5.16171	1.34349	chrmt	tRNA_gene	69846	69921
E8	ITS2-1	ITS2-1	66.7047	56.0598	10.6449	1.18989	chrXII	rRNA_gene	455182	455413			E5	tC(GCA)Q	tC(GCA)Q	24.1087	18.5891	5.51956	1.29692	chrmt	tRNA_gene	64415	64490
E8	ITS2-2	ITS2-2	67.648	56.9066	10.7415	1.18876	chrXII	rRNA_gene	464319	464550			E5	tD(GUC)Q	tD(GUC)Q	25.1277	18.4132	6.71455	1.36466	chrmt	tRNA_gene	68322	68396
E8	RDN18-1	RDN18-1	70.3943	53.9649	16.4294	1.30445	chrXII	rRNA_gene	455933	457732			E5	tE(UUC)Q	tE(UUC)Q	20.7041	15.5854	5.11871	1.32843	chrmt	tRNA_gene	35373	35444
E8	RDN18-2	RDN18-2	69.7659	53.766	15.9999	1.29758	chrXII	rRNA_gene	465070	466869			E5	tF(GAA)Q	tF(GAA)Q	20.1122	15.2611	4.85115	1.31788	chrmt	tRNA_gene	77431	77505
E8	RDN25-1	RDN25-1	65.892	51.0944	14.7976	1.28961	chrXII	rRNA_gene	451786	455181			E5	tG(UCC)Q	tG(UCC)Q	19.8912	13.944	5.94724	1.42651	chrmt	tRNA_gene	67468	67542
E8	RDN25-2	RDN25-2	66.7587	51.1795	15.5792	1.3044	chrXII	rRNA_gene	460923	464318			E5	tH(GUG)Q	tH(GUG)Q	26.1064	20.6125	5.49395	1.26653	chrmt	tRNA_gene	64596	64670
E8	RDN37-1	RDN37-1	66.6806	52.2209	14.4597	1.2769	chrXII	rRNA_gene	451575	458432			E5	tI(GAU)Q	tI(GAU)Q	19.9673	14.6755	5.29179	1.36059	chrmt	tRNA_gene	70162	70237
E8	RDN37-2	RDN37-2	68.1498	53.2394	14.9105	1.28007	chrXII	rRNA_gene	460712	467569			E5	tK(UUU)Q	tK(UUU)Q	26.5953	20.0502	6.54517	1.32644	chrmt	tRNA_gene	67061	67134
E8	RDN5-1	RDN5-1	60.7767	46.6898	14.0869	1.30171	chrXII	rRNA_gene	459676	459796			E5	tL(UAA)Q	tL(UAA)Q	22.181	17.1936	4.9874	1.29007	chrmt	tRNA_gene	66095	66179
E8	RDN5-2	RDN5-2	7.85403	5.8685	1.98553	1.33834	chrXII	rRNA_gene	468813	468931			E5	tM(CAU)Q1	tM(CAU)Q1	20.9001	14.5257	6.37439	1.43883	chrmt	tRNA_gene	72630	72705
E8	RDN58-1	RDN58-1	69.49	57.5172	11.9728	1.20816	chrXII	rRNA_gene	455414	455571			E5	tM(CAU)Q2	tM(CAU)Q2	12.4181	8.51555	3.90253	1.45828	chrmt	tRNA_gene	85035	85112
E8	RDN58-2	RDN58-2	69.9808	58.4277	11.5531	1.19773	chrXII	rRNA_gene	464551	464708			E5	tN(GUU)Q	tN(GUU)Q	16.0991	11.1135	4.98563	1.44861	chrmt	tRNA_gene	71433	71503
E8	YLR154C-G	YLR154C-G	72.1458	51.4806	20.6651	1.40142	chrXII	gene	462522	462671			E5	tP(UGG)Q	tP(UGG)Q	28.2599	23.8303	4.42957	1.18588	chrmt	tRNA_gene	731	802
E8	YLR154C-H	YLR154C-H	5.74957	4.38304	1.36653	1.31178	chrXII	gene	468827	468958			E5	tQ(UUG)Q	tQ(UUG)Q	17.0786	12.7207	4.35788	1.34258	chrmt	tRNA_gene	66210	66285
E8	YLR154W-C	TAR1	63.3449	53.3856	9.95932	1.18655	chrXII	gene	454696	455070			E5	tR(ACG)Q2	tR(ACG)Q2	28.5854	22.2589	6.3265	1.28422	chrmt	tRNA_gene	69289	69362
E9	ETS1-1	ETS1-1	94.1844	54.8208	39.3636	1.71804	chrXII	rRNA_gene	457733	458432			E5	tR(UCU)Q1	tR(UCU)Q1	21.0446	15.4287	5.61591	1.36399	chrmt	tRNA_gene	67309	67381
E9	ETS1-2	ETS1-2	94.0754	54.7745	39.3009	1.7175	chrXII	rRNA_gene	466870	467569			E5	tS(GCU)Q1	tS(GCU)Q1	28.1077	21.815	6.29261	1.28845	chrmt	tRNA_gene	69203	69288
E9	ETS2-1	ETS2-1	52.5418	29.7618	22.78	1.76541	chrXII	rRNA_gene	451575	451785			E5	tS(UGA)Q2	tS(UGA)Q2	28.2103	21.6046	6.60569	1.30575	chrmt	tRNA_gene	48201	48290
E9	ETS2-2	ETS2-2	105.682	60.748	44.9339	1.73968	chrXII	rRNA_gene	460712	460922			E5	tT(UAG)Q2	tT(UAG)Q2	14.1145	9.04199	5.07251	1.561	chrmt	tRNA_gene	78089	78162
E9	ITS1-1	ITS1-1	102.166	56.5206	45.6452	1.80759	chrXII	rRNA_gene	455572	455932			E5	tT(UGU)Q1	tT(UGU)Q1	18.2558	11.4368	6.81897	1.59623	chrmt	tRNA_gene	63862	63937
E9	ITS1-2	ITS1-2	99.9321	57.031	42.901	1.75224	chrXII	rRNA_gene	464709	465069			E5	tV(UAC)Q	tV(UAC)Q	8.26653	4.13098	4.13554	2.0011	chrmt	tRNA_gene	78533	78608
E9	ITS2-1	ITS2-1	96.3499	56.0598	40.2901	1.7187	chrXII	rRNA_gene	455182	455413			E5	tW(UCA)Q	tW(UCA)Q	20.0866	13.9731	6.11353	1.43752	chrmt	tRNA_gene	9374	9447
E9	ITS2-2	ITS2-2	96.8743	56.9066	39.9678	1.70234	chrXII	rRNA_gene	464319	464550			E5	tY(GUA)Q	tY(GUA)Q	23.4942	18.9696	4.52468	1.23852	chrmt	tRNA_gene	70824	70907
E9	RDN18-1	RDN18-1	99.8545	53.9649	45.8896	1.85036	chrXII	rRNA_gene	455933	457732			E6	Q0020	15S_RRNA	16.1916	22.5543	-6.36268	0.717894	chrmt	rRNA_gene	6546	8194
E9	RDN18-2	RDN18-2	99.2535	53.766	45.4875	1.84603	chrXII	rRNA_gene	465070	466869			E6	Q0045	COX1	12.5176	18.3661	-5.84841	0.681564	chrmt	gene	13818	26701
E9	RDN25-1	RDN25-1	92.8904	51.0944	41.796	1.81801	chrXII	rRNA_gene	451786	455181			E6	Q0050	AI1	11.5637	18.5326	-6.96896	0.623963	chrmt	gene	13818	16322
E9	RDN25-2	RDN25-2	94.4138	51.1795	43.2343	1.84476	chrXII	rRNA_gene	460923	464318			E6	Q0055	AI2	12.8251	20.106	-7.28092	0.637873	chrmt	gene	13818	18830
E9	RDN37-1	RDN37-1	94.4811	52.2209	42.2602	1.80926	chrXII	rRNA_gene	451575	458432			E6	Q0060	AI3	12.9889	20.0364	-7.04754	0.648263	chrmt	gene	13818	19996
E9	RDN37-2	RDN37-2	96.5757	53.2394	43.3364	1.81399	chrXII	rRNA_gene	460712	467569			E6	Q0065	AI4	13.4403	20.2735	-6.83325	0.662947	chrmt	gene	13818	21935
E9	RDN5-1	RDN5-1	79.9039	46.6898	33.2142	1.71138	chrXII	rRNA_gene	459676	459796			E6	Q0070	AI5_ALPHa	12.4387	18.8276	-6.38893	0.660661	chrmt	gene	13818	23167
E9	RDN5-2	RDN5-2	10.2686	5.8685	4.40014	1.74979	chrXII	rRNA_gene	468813	468931			E6	Q0075	AI5_BETa	14.8904	20.0915	-5.20109	0.74113	chrmt	gene	24156	25255
E9	RDN58-1	RDN58-1	100.85	57.5172	43.3326	1.75338	chrXII	rRNA_gene	455414	455571			E6	Q0080	ATP8	2.05847	3.34516	-1.28669	0.615358	chrmt	gene	27666	27812
E9	RDN58-2	RDN58-2	99.5368	58.4277	41.109	1.70359	chrXII	rRNA_gene	464551	464708			E6	Q0085	ATP6	12.0946	17.0533	-4.95871	0.709223	chrmt	gene	28487	29266
E9	YLR154C-G	YLR154C-G	102.765	51.4806	51.2842	1.99618	chrXII	gene	462522	462671			E6	Q0105	COb	8.70673	12.9339	-4.22713	0.673173	chrmt	gene	36540	43647
E9	YLR154C-H	YLR154C-H	7.5772	4.38304	3.19416	1.72875	chrXII	gene	468827	468958			E6	Q0110	BI2	7.73902	11.0908	-3.35179	0.697787	chrmt	gene	36540	38579
E9	YLR154W-C	TAR1	91.9998	53.3856	38.6142	1.72331	chrXII	gene	454696	455070			E6	Q0115	BI3	6.24802	8.90451	-2.65649	0.701669	chrmt	gene	36540	40265
E11	ETS1-1	ETS1-1	59.7874	54.8208	4.96658	1.0906	chrXII	rRNA_gene	457733	458432			E6	Q0120	BI4	7.76548	11.5864	-3.82093	0.670223	chrmt	gene	36540	42251
E11	ETS1-2	ETS1-2	59.8179	54.7745	5.04338	1.09208	chrXII	rRNA_gene	466870	467569			E6	Q0130	OLI1	7.15164	13.832	-6.68039	0.517035	chrmt	gene	46723	46953
E11	ETS2-1	ETS2-1	33.2751	29.7618	3.51333	1.11805	chrXII	rRNA_gene	451575	451785			E6	Q0140	VAR1	3.93514	7.65481	-3.71966	0.514075	chrmt	gene	48901	50097
E11	ETS2-2	ETS2-2	67.8184	60.748	7.07044	1.11639	chrXII	rRNA_gene	460712	460922			E6	Q0158	21S_RRNA	13.6855	19.3613	-5.67582	0.706847	chrmt	rRNA_gene	58009	62447
E11	ITS1-1	ITS1-1	64.1912	56.5206	7.67064	1.13571	chrXII	rRNA_gene	455572	455932			E6	Q0160	SCEi	11.3539	17.3951	-6.04116	0.652709	chrmt	gene	61022	61729
E11	ITS1-2	ITS1-2	66.0391	57.031	9.00805	1.15795	chrXII	rRNA_gene	464709	465069			E6	Q0250	COX2	17.0404	24.0131	-6.97271	0.70963	chrmt	gene	73758	74513
E11	ITS2-1	ITS2-1	63.0212	56.0598	6.96144	1.12418	chrXII	rRNA_gene	455182	455413			E6	Q0255	Q0255	12.919	17.5824	-4.66341	0.734768	chrmt	gene	74495	75984
E11	ITS2-2	ITS2-2	63.4957	56.9066	6.58918	1.11579	chrXII	rRNA_gene	464319	464550			E6	Q0275	COX3	18.0051	24.3462	-6.3411	0.739545	chrmt	gene	79213	80022
E11	RDN18-1	RDN18-1	63.0946	53.9649	9.12966	1.16918	chrXII	rRNA_gene	455933	457732			E6	tA(UGC)Q	tA(UGC)Q	7.65857	15.0273	-7.36874	0.509644	chrmt	tRNA_gene	69846	69921
E11	RDN18-2	RDN18-2	63.092	53.766	9.32601	1.17346	chrXII	rRNA_gene	465070	466869			E6	tC(GCA)Q	tC(GCA)Q	10.6602	18.5891	-7.92893	0.573465	chrmt	tRNA_gene	64415	64490
E11	RDN25-1	RDN25-1	59.9029	51.0944	8.80843	1.1724	chrXII	rRNA_gene	451786	455181			E6	tD(GUC)Q	tD(GUC)Q	10.2736	18.4132	-8.13963	0.557946	chrmt	tRNA_gene	68322	68396
E11	RDN25-2	RDN25-2	60.774	51.1795	9.59455	1.18747	chrXII	rRNA_gene	460923	464318			E6	tE(UUC)Q	tE(UUC)Q	10.2231	15.5854	-5.3623	0.655941	chrmt	tRNA_gene	35373	35444
E11	RDN37-1	RDN37-1	60.3917	52.2209	8.17086	1.15647	chrXII	rRNA_gene	451575	458432			E6	tF(GAA)Q	tF(GAA)Q	7.25326	15.2611	-8.00784	0.475277	chrmt	tRNA_gene	77431	77505
E11	RDN37-2	RDN37-2	62.0545	53.2394	8.81517	1.16558	chrXII	rRNA_gene	460712	467569			E6	tG(UCC)Q	tG(UCC)Q	7.5722	13.944	-6.37178	0.543044	chrmt	tRNA_gene	67468	67542
E11	RDN5-1	RDN5-1	51.7294	46.6898	5.03961	1.10794	chrXII	rRNA_gene	459676	459796			E6	tH(GUG)Q	tH(GUG)Q	12.2662	20.6125	-8.34631	0.595085	chrmt	tRNA_gene	64596	64670
E11	RDN5-2	RDN5-2	6.79396	5.8685	0.92546	1.1577	chrXII	rRNA_gene	468813	468931			E6	tI(GAU)Q	tI(GAU)Q	7.2427	14.6755	-7.4328	0.493523	chrmt	tRNA_gene	70162	70237
E11	RDN58-1	RDN58-1	64.1411	57.5172	6.6239	1.11516	chrXII	rRNA_gene	455414	455571			E6	tK(UUU)Q	tK(UUU)Q	13.0058	20.0502	-7.04433	0.648665	chrmt	tRNA_gene	67061	67134
E11	RDN58-2	RDN58-2	66.2657	58.4277	7.83797	1.13415	chrXII	rRNA_gene	464551	464708			E6	tL(UAA)Q	tL(UAA)Q	10.9803	17.1936	-6.21335	0.638625	chrmt	tRNA_gene	66095	66179
E11	YLR154C-G	YLR154C-G	62.6498	51.4806	11.1692	1.21696	chrXII	gene	462522	462671			E6	tM(CAU)Q1	tM(CAU)Q1	9.15516	14.5257	-5.37058	0.630272	chrmt	tRNA_gene	72630	72705
E11	YLR154W-C	TAR1	61.978	53.3856	8.59246	1.16095	chrXII	gene	454696	455070			E6	tM(CAU)Q2	tM(CAU)Q2	5.05319	8.51555	-3.46237	0.593407	chrmt	tRNA_gene	85035	85112
													E6	tN(GUU)Q	tN(GUU)Q	6.59952	11.1135	-4.51394	0.593831	chrmt	tRNA_gene	71433	71503
													E6	tP(UGG)Q	tP(UGG)Q	15.3278	23.8303	-8.50252	0.643206	chrmt	tRNA_gene	731	802
													E6	tQ(UUG)Q	tQ(UUG)Q	8.10261	12.7207	-4.61809	0.636963	chrmt	tRNA_gene	66210	66285
													E6	tR(ACG)Q2	tR(ACG)Q2	12.7437	22.2589	-9.51513	0.572524	chrmt	tRNA_gene	69289	69362
													E6	tR(UCU)Q1	tR(UCU)Q1	8.42081	15.4287	-7.00785	0.54579	chrmt	tRNA_gene	67309	67381
													E6	tS(GCU)Q1	tS(GCU)Q1	12.5785	21.815	-9.23657	0.576596	chrmt	tRNA_gene	69203	69288
													E6	tS(UGA)Q2	tS(UGA)Q2	13.4621	21.6046	-8.14248	0.623114	chrmt	tRNA_gene	48201	48290
													E6	tT(UAG)Q2	tT(UAG)Q2	4.16265	9.04199	-4.87933	0.460369	chrmt	tRNA_gene	78089	78162
													E6	tT(UGU)Q1	tT(UGU)Q1	6.44029	11.4368	-4.99656	0.563118	chrmt	tRNA_gene	63862	63937
													E6	tV(UAC)Q	tV(UAC)Q	2.3386	4.13098	-1.79239	0.566111	chrmt	tRNA_gene	78533	78608
													E6	tW(UCA)Q	tW(UCA)Q	6.10876	13.9731	-7.86435	0.43718	chrmt	tRNA_gene	9374	9447
													E6	tY(GUA)Q	tY(GUA)Q	11.8687	18.9696	-7.1009	0.625669	chrmt	tRNA_gene	70824	70907
													E7	Q0020	15S_RRNA	29.9384	22.5543	7.38412	1.32739	chrmt	rRNA_gene	6546	8194
													E7	Q0045	COX1	24.2303	18.3661	5.86428	1.3193	chrmt	gene	13818	26701
													E7	Q0050	AI1	23.495	18.5326	4.96235	1.26776	chrmt	gene	13818	16322
													E7	Q0055	AI2	25.4345	20.106	5.32856	1.26502	chrmt	gene	13818	18830
													E7	Q0060	AI3	25.3983	20.0364	5.36191	1.26761	chrmt	gene	13818	19996
													E7	Q0065	AI4	26.1873	20.2735	5.91375	1.2917	chrmt	gene	13818	21935
													E7	Q0070	AI5_ALPHa	24.3959	18.8276	5.56833	1.29575	chrmt	gene	13818	23167
													E7	Q0075	AI5_BETa	28.3466	20.0915	8.25506	1.41087	chrmt	gene	24156	25255
													E7	Q0080	ATP8	4.84298	3.34516	1.49782	1.44776	chrmt	gene	27666	27812
													E7	Q0085	ATP6	23.3964	17.0533	6.34309	1.37196	chrmt	gene	28487	29266
													E7	Q0105	COb	17.867	12.9339	4.93318	1.38142	chrmt	gene	36540	43647
													E7	Q0110	BI2	15.6585	11.0908	4.5677	1.41185	chrmt	gene	36540	38579
													E7	Q0115	BI3	12.8577	8.90451	3.9532	1.44395	chrmt	gene	36540	40265
													E7	Q0120	BI4	16.1569	11.5864	4.57048	1.39447	chrmt	gene	36540	42251
													E7	Q0130	OLI1	17.9031	13.832	4.07104	1.29432	chrmt	gene	46723	46953
													E7	Q0140	VAR1	11.3405	7.65481	3.68567	1.48148	chrmt	gene	48901	50097
													E7	Q0158	21S_RRNA	25.4234	19.3613	6.06205	1.3131	chrmt	rRNA_gene	58009	62447
													E7	Q0160	SCEi	21.3741	17.3951	3.97903	1.22874	chrmt	gene	61022	61729
													E7	Q0250	COX2	29.2059	24.0131	5.19271	1.21624	chrmt	gene	73758	74513
													E7	Q0255	Q0255	23.8175	17.5824	6.23515	1.35463	chrmt	gene	74495	75984
													E7	Q0275	COX3	31.3289	24.3462	6.98269	1.28681	chrmt	gene	79213	80022
													E7	tA(UGC)Q	tA(UGC)Q	19.3685	15.0273	4.34117	1.28889	chrmt	tRNA_gene	69846	69921
													E7	tC(GCA)Q	tC(GCA)Q	27.6446	18.5891	9.05541	1.48713	chrmt	tRNA_gene	64415	64490
													E7	tD(GUC)Q	tD(GUC)Q	25.9426	18.4132	7.52944	1.40892	chrmt	tRNA_gene	68322	68396
													E7	tE(UUC)Q	tE(UUC)Q	20.9494	15.5854	5.36397	1.34417	chrmt	tRNA_gene	35373	35444
													E7	tF(GAA)Q	tF(GAA)Q	19.7475	15.2611	4.48638	1.29398	chrmt	tRNA_gene	77431	77505
													E7	tG(UCC)Q	tG(UCC)Q	17.8404	13.944	3.89645	1.27944	chrmt	tRNA_gene	67468	67542
													E7	tH(GUG)Q	tH(GUG)Q	28.4553	20.6125	7.84283	1.38049	chrmt	tRNA_gene	64596	64670
													E7	tI(GAU)Q	tI(GAU)Q	18.4311	14.6755	3.75562	1.25591	chrmt	tRNA_gene	70162	70237
													E7	tK(UUU)Q	tK(UUU)Q	28.7831	20.0502	8.73299	1.43556	chrmt	tRNA_gene	67061	67134
													E7	tL(UAA)Q	tL(UAA)Q	25.0878	17.1936	7.89413	1.45913	chrmt	tRNA_gene	66095	66179
													E7	tM(CAU)Q1	tM(CAU)Q1	22.7189	14.5257	8.1932	1.56405	chrmt	tRNA_gene	72630	72705
													E7	tM(CAU)Q2	tM(CAU)Q2	12.6859	8.51555	4.17039	1.48974	chrmt	tRNA_gene	85035	85112
													E7	tN(GUU)Q	tN(GUU)Q	16.9533	11.1135	5.83988	1.52548	chrmt	tRNA_gene	71433	71503
													E7	tP(UGG)Q	tP(UGG)Q	32.2452	23.8303	8.4149	1.35312	chrmt	tRNA_gene	731	802
													E7	tQ(UUG)Q	tQ(UUG)Q	19.4194	12.7207	6.69868	1.5266	chrmt	tRNA_gene	66210	66285
													E7	tR(ACG)Q2	tR(ACG)Q2	31.3897	22.2589	9.13085	1.41021	chrmt	tRNA_gene	69289	69362
													E7	tR(UCU)Q1	tR(UCU)Q1	19.0904	15.4287	3.66171	1.23733	chrmt	tRNA_gene	67309	67381
													E7	tS(GCU)Q1	tS(GCU)Q1	31.4533	21.815	9.63825	1.44182	chrmt	tRNA_gene	69203	69288
													E7	tS(UGA)Q2	tS(UGA)Q2	30.761	21.6046	9.15636	1.42382	chrmt	tRNA_gene	48201	48290
													E7	tT(UAG)Q2	tT(UAG)Q2	13.9216	9.04199	4.87966	1.53967	chrmt	tRNA_gene	78089	78162
													E7	tT(UGU)Q1	tT(UGU)Q1	16.8026	11.4368	5.36579	1.46917	chrmt	tRNA_gene	63862	63937
													E7	tV(UAC)Q	tV(UAC)Q	7.58837	4.13098	3.45738	1.83694	chrmt	tRNA_gene	78533	78608
													E7	tW(UCA)Q	tW(UCA)Q	20.4134	13.9731	6.44028	1.46091	chrmt	tRNA_gene	9374	9447
													E7	tY(GUA)Q	tY(GUA)Q	24.0375	18.9696	5.06795	1.26716	chrmt	tRNA_gene	70824	70907
													E8	Q0020	15S_RRNA	16.5541	22.5543	-6.00016	0.733967	chrmt	rRNA_gene	6546	8194
													E8	Q0045	COX1	15.7612	18.3661	-2.60483	0.858171	chrmt	gene	13818	26701
													E8	Q0050	AI1	16.6522	18.5326	-1.88039	0.898536	chrmt	gene	13818	16322
													E8	Q0055	AI2	18.2649	20.106	-1.84107	0.908432	chrmt	gene	13818	18830
													E8	Q0060	AI3	17.909	20.0364	-2.12737	0.893825	chrmt	gene	13818	19996
													E8	Q0065	AI4	18.6187	20.2735	-1.6548	0.918376	chrmt	gene	13818	21935
													E8	Q0070	AI5_ALPHa	17.4577	18.8276	-1.36986	0.927242	chrmt	gene	13818	23167
													E8	Q0075	AI5_BETa	12.282	20.0915	-7.8095	0.611304	chrmt	gene	24156	25255
													E8	Q0080	ATP8	1.11573	3.34516	-2.22943	0.333535	chrmt	gene	27666	27812
													E8	Q0105	COb	10.0396	12.9339	-2.89424	0.776228	chrmt	gene	36540	43647
													E8	Q0110	BI2	10.2608	11.0908	-0.829995	0.925164	chrmt	gene	36540	38579
													E8	Q0115	BI3	8.06388	8.90451	-0.840628	0.905595	chrmt	gene	36540	40265
													E8	Q0120	BI4	9.52032	11.5864	-2.06609	0.82168	chrmt	gene	36540	42251
													E8	Q0130	OLI1	5.84075	13.832	-7.99129	0.422262	chrmt	gene	46723	46953
													E8	Q0140	VAR1	3.54129	7.65481	-4.11352	0.462623	chrmt	gene	48901	50097
													E8	Q0158	21S_RRNA	15.7244	19.3613	-3.63691	0.812156	chrmt	rRNA_gene	58009	62447
													E8	Q0160	SCEi	14.4874	17.3951	-2.90769	0.832844	chrmt	gene	61022	61729
													E8	Q0250	COX2	19.5839	24.0131	-4.4292	0.815551	chrmt	gene	73758	74513
													E8	Q0255	Q0255	12.1686	17.5824	-5.41373	0.692093	chrmt	gene	74495	75984
													E8	Q0275	COX3	26.5158	24.3462	2.16952	1.08911	chrmt	gene	79213	80022
													E8	tA(UGC)Q	tA(UGC)Q	4.79123	15.0273	-10.2361	0.318835	chrmt	tRNA_gene	69846	69921
													E8	tC(GCA)Q	tC(GCA)Q	8.76553	18.5891	-9.82361	0.47154	chrmt	tRNA_gene	64415	64490
													E8	tD(GUC)Q	tD(GUC)Q	5.29923	18.4132	-13.114	0.287795	chrmt	tRNA_gene	68322	68396
													E8	tE(UUC)Q	tE(UUC)Q	7.10671	15.5854	-8.47869	0.455985	chrmt	tRNA_gene	35373	35444
													E8	tF(GAA)Q	tF(GAA)Q	5.21725	15.2611	-10.0438	0.341866	chrmt	tRNA_gene	77431	77505
													E8	tG(UCC)Q	tG(UCC)Q	3.87238	13.944	-10.0716	0.27771	chrmt	tRNA_gene	67468	67542
													E8	tH(GUG)Q	tH(GUG)Q	7.36353	20.6125	-13.249	0.357236	chrmt	tRNA_gene	64596	64670
													E8	tI(GAU)Q	tI(GAU)Q	3.54177	14.6755	-11.1337	0.241339	chrmt	tRNA_gene	70162	70237
													E8	tK(UUU)Q	tK(UUU)Q	9.8123	20.0502	-10.2379	0.489388	chrmt	tRNA_gene	67061	67134
													E8	tL(UAA)Q	tL(UAA)Q	9.62813	17.1936	-7.56552	0.559982	chrmt	tRNA_gene	66095	66179
													E8	tM(CAU)Q1	tM(CAU)Q1	7.71287	14.5257	-6.81286	0.53098	chrmt	tRNA_gene	72630	72705
													E8	tM(CAU)Q2	tM(CAU)Q2	3.2511	8.51555	-5.26445	0.381784	chrmt	tRNA_gene	85035	85112
													E8	tN(GUU)Q	tN(GUU)Q	7.44117	11.1135	-3.67229	0.669564	chrmt	tRNA_gene	71433	71503
													E8	tP(UGG)Q	tP(UGG)Q	14.9638	23.8303	-8.8665	0.627932	chrmt	tRNA_gene	731	802
													E8	tQ(UUG)Q	tQ(UUG)Q	7.04561	12.7207	-5.67509	0.55387	chrmt	tRNA_gene	66210	66285
													E8	tR(ACG)Q2	tR(ACG)Q2	13.4885	22.2589	-8.77036	0.605984	chrmt	tRNA_gene	69289	69362
													E8	tR(UCU)Q1	tR(UCU)Q1	4.12819	15.4287	-11.3005	0.267567	chrmt	tRNA_gene	67309	67381
													E8	tS(GCU)Q1	tS(GCU)Q1	14.1048	21.815	-7.71022	0.646564	chrmt	tRNA_gene	69203	69288
													E8	tS(UGA)Q2	tS(UGA)Q2	13.1184	21.6046	-8.4862	0.607204	chrmt	tRNA_gene	48201	48290
													E8	tT(UAG)Q2	tT(UAG)Q2	2.27635	9.04199	-6.76564	0.251753	chrmt	tRNA_gene	78089	78162
													E8	tT(UGU)Q1	tT(UGU)Q1	4.96992	11.4368	-6.46693	0.434553	chrmt	tRNA_gene	63862	63937
													E8	tV(UAC)Q	tV(UAC)Q	2.15598	4.13098	-1.97501	0.521904	chrmt	tRNA_gene	78533	78608
													E8	tW(UCA)Q	tW(UCA)Q	6.18032	13.9731	-7.79278	0.442301	chrmt	tRNA_gene	9374	9447
													E8	tY(GUA)Q	tY(GUA)Q	6.12546	18.9696	-12.8441	0.32291	chrmt	tRNA_gene	70824	70907
													E9	Q0020	15S_RRNA	26.9455	22.5543	4.39129	1.1947	chrmt	rRNA_gene	6546	8194
													E9	Q0045	COX1	21.049	18.3661	2.68294	1.14608	chrmt	gene	13818	26701
													E9	Q0050	AI1	20.638	18.5326	2.10534	1.1136	chrmt	gene	13818	16322
													E9	Q0055	AI2	22.8541	20.106	2.74808	1.13668	chrmt	gene	13818	18830
													E9	Q0060	AI3	22.6073	20.0364	2.57093	1.12831	chrmt	gene	13818	19996
													E9	Q0065	AI4	22.8411	20.2735	2.5676	1.12665	chrmt	gene	13818	21935
													E9	Q0070	AI5_ALPHa	21.0955	18.8276	2.26793	1.12046	chrmt	gene	13818	23167
													E9	Q0075	AI5_BETa	24.8144	20.0915	4.72292	1.23507	chrmt	gene	24156	25255
													E9	Q0085	ATP6	21.1196	17.0533	4.06634	1.23845	chrmt	gene	28487	29266
													E9	Q0105	COb	14.5765	12.9339	1.64265	1.127	chrmt	gene	36540	43647
													E9	Q0110	BI2	12.8774	11.0908	1.7866	1.16109	chrmt	gene	36540	38579
													E9	Q0115	BI3	9.72284	8.90451	0.818334	1.0919	chrmt	gene	36540	40265
													E9	Q0120	BI4	13.0277	11.5864	1.44125	1.12439	chrmt	gene	36540	42251
													E9	Q0130	OLI1	16.7912	13.832	2.95914	1.21393	chrmt	gene	46723	46953
													E9	Q0140	VAR1	9.784	7.65481	2.12919	1.27815	chrmt	gene	48901	50097
													E9	Q0158	21S_RRNA	23.2661	19.3613	3.90474	1.20168	chrmt	rRNA_gene	58009	62447
													E9	Q0160	SCEi	19.4465	17.3951	2.05137	1.11793	chrmt	gene	61022	61729
													E9	Q0250	COX2	27.4087	24.0131	3.39551	1.1414	chrmt	gene	73758	74513
													E9	Q0255	Q0255	20.6224	17.5824	3.03999	1.1729	chrmt	gene	74495	75984
													E9	Q0275	COX3	30.2685	24.3462	5.9223	1.24325	chrmt	gene	79213	80022
													E9	tA(UGC)Q	tA(UGC)Q	17.5052	15.0273	2.47791	1.16489	chrmt	tRNA_gene	69846	69921
													E9	tC(GCA)Q	tC(GCA)Q	25.2751	18.5891	6.68591	1.35967	chrmt	tRNA_gene	64415	64490
													E9	tD(GUC)Q	tD(GUC)Q	22.8838	18.4132	4.47063	1.2428	chrmt	tRNA_gene	68322	68396
													E9	tE(UUC)Q	tE(UUC)Q	20.2159	15.5854	4.63051	1.29711	chrmt	tRNA_gene	35373	35444
													E9	tF(GAA)Q	tF(GAA)Q	18.7039	15.2611	3.4428	1.22559	chrmt	tRNA_gene	77431	77505
													E9	tG(UCC)Q	tG(UCC)Q	16.3657	13.944	2.4217	1.17367	chrmt	tRNA_gene	67468	67542
													E9	tH(GUG)Q	tH(GUG)Q	27.4943	20.6125	6.88181	1.33387	chrmt	tRNA_gene	64596	64670
													E9	tI(GAU)Q	tI(GAU)Q	15.7913	14.6755	1.11577	1.07603	chrmt	tRNA_gene	70162	70237
													E9	tK(UUU)Q	tK(UUU)Q	27.8145	20.0502	7.76437	1.38725	chrmt	tRNA_gene	67061	67134
													E9	tL(UAA)Q	tL(UAA)Q	23.3798	17.1936	6.1862	1.3598	chrmt	tRNA_gene	66095	66179
													E9	tM(CAU)Q1	tM(CAU)Q1	20.7189	14.5257	6.19318	1.42636	chrmt	tRNA_gene	72630	72705
													E9	tM(CAU)Q2	tM(CAU)Q2	11.2598	8.51555	2.74428	1.32227	chrmt	tRNA_gene	85035	85112
													E9	tN(GUU)Q	tN(GUU)Q	14.4723	11.1135	3.35883	1.30223	chrmt	tRNA_gene	71433	71503
													E9	tP(UGG)Q	tP(UGG)Q	30.0367	23.8303	6.20643	1.26044	chrmt	tRNA_gene	731	802
													E9	tQ(UUG)Q	tQ(UUG)Q	17.1937	12.7207	4.473	1.35163	chrmt	tRNA_gene	66210	66285
													E9	tR(ACG)Q2	tR(ACG)Q2	29.5484	22.2589	7.2895	1.32749	chrmt	tRNA_gene	69289	69362
													E9	tR(UCU)Q1	tR(UCU)Q1	18.3597	15.4287	2.93109	1.18998	chrmt	tRNA_gene	67309	67381
													E9	tS(GCU)Q1	tS(GCU)Q1	29.1257	21.815	7.31061	1.33512	chrmt	tRNA_gene	69203	69288
													E9	tS(UGA)Q2	tS(UGA)Q2	28.8567	21.6046	7.25212	1.33567	chrmt	tRNA_gene	48201	48290
													E9	tT(UAG)Q2	tT(UAG)Q2	11.1834	9.04199	2.14138	1.23683	chrmt	tRNA_gene	78089	78162
													E9	tT(UGU)Q1	tT(UGU)Q1	15.8832	11.4368	4.44639	1.38878	chrmt	tRNA_gene	63862	63937
													E9	tV(UAC)Q	tV(UAC)Q	6.86178	4.13098	2.73079	1.66105	chrmt	tRNA_gene	78533	78608
													E9	tW(UCA)Q	tW(UCA)Q	17.4577	13.9731	3.48465	1.24938	chrmt	tRNA_gene	9374	9447
													E9	tY(GUA)Q	tY(GUA)Q	21.6874	18.9696	2.71787	1.14328	chrmt	tRNA_gene	70824	70907
													E11	Q0020	15S_RRNA	17.521	22.5543	-5.03324	0.776839	chrmt	rRNA_gene	6546	8194
													E11	Q0045	COX1	15.305	18.3661	-3.06107	0.83333	chrmt	gene	13818	26701
													E11	Q0050	AI1	14.9194	18.5326	-3.61317	0.805037	chrmt	gene	13818	16322
													E11	Q0055	AI2	16.9318	20.106	-3.17413	0.84213	chrmt	gene	13818	18830
													E11	Q0060	AI3	16.8147	20.0364	-3.22166	0.83921	chrmt	gene	13818	19996
													E11	Q0065	AI4	17.1021	20.2735	-3.1714	0.84357	chrmt	gene	13818	21935
													E11	Q0070	AI5_ALPHa	15.7332	18.8276	-3.09434	0.835649	chrmt	gene	13818	23167
													E11	Q0075	AI5_BETa	17.0256	20.0915	-3.06596	0.8474	chrmt	gene	24156	25255
													E11	Q0080	ATP8	1.62405	3.34516	-1.72111	0.485493	chrmt	gene	27666	27812
													E11	Q0085	ATP6	14.3742	17.0533	-2.6791	0.842899	chrmt	gene	28487	29266
													E11	Q0105	COb	9.63177	12.9339	-3.3021	0.744694	chrmt	gene	36540	43647
													E11	Q0110	BI2	8.45576	11.0908	-2.63504	0.762412	chrmt	gene	36540	38579
													E11	Q0115	BI3	6.23561	8.90451	-2.6689	0.700276	chrmt	gene	36540	40265
													E11	Q0120	BI4	8.47662	11.5864	-3.10979	0.7316	chrmt	gene	36540	42251
													E11	Q0130	OLI1	6.97464	13.832	-6.8574	0.504238	chrmt	gene	46723	46953
													E11	Q0140	VAR1	3.47896	7.65481	-4.17585	0.45448	chrmt	gene	48901	50097
													E11	Q0158	21S_RRNA	15.7666	19.3613	-3.59474	0.814334	chrmt	rRNA_gene	58009	62447
													E11	Q0160	SCEi	13.7135	17.3951	-3.68162	0.788353	chrmt	gene	61022	61729
													E11	Q0250	COX2	19.5787	24.0131	-4.43448	0.815331	chrmt	gene	73758	74513
													E11	Q0255	Q0255	14.0672	17.5824	-3.51515	0.800075	chrmt	gene	74495	75984
													E11	Q0275	COX3	21.2383	24.3462	-3.10798	0.872342	chrmt	gene	79213	80022
													E11	tA(UGC)Q	tA(UGC)Q	7.08028	15.0273	-7.94702	0.471161	chrmt	tRNA_gene	69846	69921
													E11	tC(GCA)Q	tC(GCA)Q	10.6074	18.5891	-7.9817	0.570626	chrmt	tRNA_gene	64415	64490
													E11	tD(GUC)Q	tD(GUC)Q	9.90278	18.4132	-8.5104	0.537809	chrmt	tRNA_gene	68322	68396
													E11	tE(UUC)Q	tE(UUC)Q	10.3194	15.5854	-5.26601	0.662119	chrmt	tRNA_gene	35373	35444
													E11	tF(GAA)Q	tF(GAA)Q	7.805	15.2611	-7.4561	0.511431	chrmt	tRNA_gene	77431	77505
													E11	tG(UCC)Q	tG(UCC)Q	6.77483	13.944	-7.16915	0.485861	chrmt	tRNA_gene	67468	67542
													E11	tH(GUG)Q	tH(GUG)Q	11.2483	20.6125	-9.3642	0.545703	chrmt	tRNA_gene	64596	64670
													E11	tI(GAU)Q	tI(GAU)Q	5.86476	14.6755	-8.81074	0.399629	chrmt	tRNA_gene	70162	70237
													E11	tK(UUU)Q	tK(UUU)Q	14.2371	20.0502	-5.81303	0.710076	chrmt	tRNA_gene	67061	67134
													E11	tL(UAA)Q	tL(UAA)Q	11.8464	17.1936	-5.34728	0.688997	chrmt	tRNA_gene	66095	66179
													E11	tM(CAU)Q1	tM(CAU)Q1	11.3612	14.5257	-3.16451	0.782145	chrmt	tRNA_gene	72630	72705
													E11	tM(CAU)Q2	tM(CAU)Q2	4.96231	8.51555	-3.55325	0.582734	chrmt	tRNA_gene	85035	85112
													E11	tN(GUU)Q	tN(GUU)Q	6.91679	11.1135	-4.19667	0.62238	chrmt	tRNA_gene	71433	71503
													E11	tP(UGG)Q	tP(UGG)Q	18.2278	23.8303	-5.60256	0.764898	chrmt	tRNA_gene	731	802
													E11	tQ(UUG)Q	tQ(UUG)Q	8.90524	12.7207	-3.81546	0.700059	chrmt	tRNA_gene	66210	66285
													E11	tR(ACG)Q2	tR(ACG)Q2	14.1188	22.2589	-8.14007	0.6343	chrmt	tRNA_gene	69289	69362
													E11	tR(UCU)Q1	tR(UCU)Q1	7.8806	15.4287	-7.54805	0.510777	chrmt	tRNA_gene	67309	67381
													E11	tS(GCU)Q1	tS(GCU)Q1	14.2967	21.815	-7.51838	0.655358	chrmt	tRNA_gene	69203	69288
													E11	tS(UGA)Q2	tS(UGA)Q2	14.9671	21.6046	-6.63755	0.692771	chrmt	tRNA_gene	48201	48290
													E11	tT(UAG)Q2	tT(UAG)Q2	4.03716	9.04199	-5.00482	0.446491	chrmt	tRNA_gene	78089	78162
													E11	tT(UGU)Q1	tT(UGU)Q1	6.23767	11.4368	-5.19918	0.545401	chrmt	tRNA_gene	63862	63937
													E11	tV(UAC)Q	tV(UAC)Q	2.13137	4.13098	-1.99961	0.515947	chrmt	tRNA_gene	78533	78608
													E11	tW(UCA)Q	tW(UCA)Q	6.33935	13.9731	-7.63375	0.453682	chrmt	tRNA_gene	9374	9447
													E11	tY(GUA)Q	tY(GUA)Q	11.45	18.9696	-7.51954	0.6036	chrmt	tRNA_gene	70824	70907
