# Supplementary material for: Heterologous Hsp90 promotes phenotypic diversity through network evolution
Source: PLoS Biol. 2018 Nov 15;16(11):e2006450. doi: 10.1371/journal.pbio.2006450 (PMC6264905; doi:10.1371/journal.pbio.2006450)
Supplement: S12 Table — (XLSX) [file pbio.2006450.s020.xlsx]

## Sheet: Sheet1
Strains:
Strain Name	Species	Parental Strain	Genotype
JYL1821	S. cerevisiae	R1158	MATa ura3::pCMV-tTA-FOA met15D0 his3D1 leu2D0 trp1D63
JYL1827	S. cerevisiae	JYL1821	MATa ura3::pCMV-tTA-FOA met15D0 his3D1 leu2D0 trp1D63 hsp82Δ::NAT (Clonat+) hsc82Δ::G418 pRS416-Scer-HSC82
JYL5001	S. cerevisiae	JYL1827	MATa ura3::pCMV-tTA-FOA met15D0 his3D1 leu2D0 trp1D63 hsp82Δ::NAT (Clonat+) hsc82Δ::G418 pRS413-kanR-TetO7-TATACYC1-Scer-HSC82
JYL1831	S. cerevisiae	JYL1827	MATa ura3::pCMV-tTA-FOA met15D0 his3D1 leu2D0 trp1D63 hsp82Δ::NAT (Clonat+) hsc82Δ::G418 pRS413-kanR-TetO7-TATACYC1-Ncas-HSP90
JYL1833	S. cerevisiae	JYL1827	MATa ura3::pCMV-tTA-FOA met15D0 his3D1 leu2D0 trp1D63 hsp82Δ::NAT (Clonat+) hsc82Δ::G418 pRS413-kanR-TetO7-TATACYC1-Klac-HSP90
JYL1835	S. cerevisiae	JYL1827	MATa ura3::pCMV-tTA-FOA met15D0 his3D1 leu2D0 trp1D63 hsp82Δ::NAT (Clonat+) hsc82Δ::G418 pRS413-kanR-TetO7-TATACYC1-Ylip-HSP90
Sc-HSC82 Green Ancestor	S. cerevisiae	JYL5001	MATa ura3::pCMV-tTA-FOA met15D0 his3D1 leu2D0 trp1D63 hsp82Δ::NAT (Clonat+) hsc82Δ::G418 pRS413-kanR-TetO7-TATACYC1-Scer-HSC82 pGS62
Sc-HSC82 Red Ancestor	S. cerevisiae	JYL5001	MATa ura3::pCMV-tTA-FOA met15D0 his3D1 leu2D0 trp1D63 hsp82Δ::NAT (Clonat+) hsc82Δ::G418 pRS413-kanR-TetO7-TATACYC1-Scer-HSC82 pGS64
Yl-HSP90 Green Ancestor	S. cerevisiae	JYL1835	MATa ura3::pCMV-tTA-FOA met15D0 his3D1 leu2D0 trp1D63 hsp82Δ::NAT (Clonat+) hsc82Δ::G418 pRS413-kanR-TetO7-TATACYC1-Ylip-HSP90 pGS62
Yl-HSP90 Red Ancestor	S. cerevisiae	JYL1835	MATa ura3::pCMV-tTA-FOA met15D0 his3D1 leu2D0 trp1D63 hsp82Δ::NAT (Clonat+) hsc82Δ::G418 pRS413-kanR-TetO7-TATACYC1-Ylip-HSP90 pGS64
Yl-HSP90 Green espCas9 1.1	S. cerevisiae	Yl-HSP90 Green Ancestor	MATa ura3::pCMV-tTA-FOA met15D0 his3D1 leu2D0 trp1D63 hsp82Δ::NAT (Clonat+) hsc82Δ::G418 pRS415-kanR-TetO7-TATACYC1-Ylip-HSP90 pRS414-TEF1p-eSpCas9 (1.1)-CYC1t
Yl-HSP90 Green WT Cas9	S. cerevisiae	Yl-HSP90 Green Ancestor	MATa ura3::pCMV-tTA-FOA met15D0 his3D1 leu2D0 trp1D63 hsp82Δ::NAT (Clonat+) hsc82Δ::G418 pRS415-kanR-TetO7-TATACYC1-Ylip-HSP90 pRS414-TEF1p-Cas9-CYC1t
Yl-HSP90 Red espCas9 1.1	S. cerevisiae	Yl-HSP90 Red Ancestor	MATa ura3::pCMV-tTA-FOA met15D0 his3D1 leu2D0 trp1D63 hsp82Δ::NAT (Clonat+) hsc82Δ::G418 pRS415-kanR-TetO7-TATACYC1-Ylip-HSP90 pRS414-TEF1p-eSpCas9 (1.1)-CYC1t
JLD291	N. castellii		MATa/b
JLD300	K. lactis		MATa/b
JLD301	Y. lipolytica
Quantitative PCR primers:
Sc-HSC82 QPCR_F	TTCTATAAGTCTATTTCTAACGACTGGG
Sc-HSC82 QPCR_R	TCAGCTTCATCAGTGATGAAGACACG
Yl-HSP90 QPCR_F	TTCTACAAGTCTATCTCTAACGACTGGG
Yl-HSP90 QPCR_R	TCAGCGTCATCAGTGATGAAGACACG
TDH3-QPCR_F	TCA GAG TCC CAA CCG TCG ATG
TDH3-QPCR-R	AGA CAA CAG CGT CTT CGG TGT AAC C
CRISPR guide RNA and primers:
IgRNAAB-F	GGTGATTACATGTACGTTTGAAG
IgRNAAB-R	CCGCAAATTAAAGCCTTCGA
TAP42 guide RNA	ATGATTCGGATGTTGCTCAAAGG
TAP42gRNA-R	TTGAGCAACATCCGAATCATGATCATTTATCTTTCACTGCG
TAP42gRNA-F	ATGATTCGGATGTTGCTCAAGTTTTAGAGCTAGAAATAGCAAG
SEC9 guide RNA	TTAAATGAAGAACCTAGAACAGG
SEC9gRNA-R	GTTCTAGGTTCTTCATTTAAGATCATTTATCTTTCACTGCG
SEC9gRNA-F	TTAAATGAAGAACCTAGAACGTTTTAGAGCTAGAAATAGCAAG
CBK1 guide RNA	TAGTTGCCACCTGATTAGCATGG
CBK1gRNA-R	TGCTAATCAGGTGGCAACTAGATCATTTATCTTTCACTGCG
CBK1gRNA-F	TAGTTGCCACCTGATTAGCAGTTTTAGAGCTAGAAATAGCAAG
BUD4 guide RNA	TCACTATTATTCATGCCCTCTGG
BUD4gRNA-R	GAGGGCATGAATAATAGTGAGATCATTTATCTTTCACTGCG
BUD4gRNA-F	TCACTATTATTCATGCCCTCGTTTTAGAGCTAGAAATAGCAAG
IZH3 guide RNA	TGCTTCTACATCCACTTCACTGG
IZH3 gRNA-R	GTGAAGTGGATGTAGAAGCA GATCATTTATCTTTCACTGCG
IZH3 gRNA-F	TGCTTCTACATCCACTTCAC GTTTTAGAGCTAGAAATAGCAAG
BRE5 guide RNA	AAGAATTCGGTAAAGTTATGAGG
BRE5gRNA-R	CATAACTTTACCGAATTCTT GATCATTTATCTTTCACTGCG
BRE5gRNA-F	AAGAATTCGGTAAAGTTATG GTTTTAGAGCTAGAAATAGCAAG
MDM12 guide RNA	CTACGGGATAATTCAGCACAAGG
MDM12gRNA-R	TGTGCTGAATTATCCCGTAGGATCATTTATCTTTCACTGCG
MDM12gRNA-F	CTACGGGATAATTCAGCACAGTTTTAGAGCTAGAAATAGCAAG
PBP1 guide RNA	CTAATTCCAACAAGGGGAATAGG
PBP1gRNA-R	ATTCCCCTTGTTGGAATTAGGATCATTTATCTTTCACTGCG
PBP1gRNA-F	CTAATTCCAACAAGGGGAATGTTTTAGAGCTAGAAATAGCAAG
SIZ1 guide RNA	GAATTTGTAGTTGGGAGTGTAGG
SIZ1gRNA-R	ACACTCCCAACTACAAATTCGATCATTTATCTTTCACTGCG
SIZ1gRNA-F	GAATTTGTAGTTGGGAGTGTGTTTTAGAGCTAGAAATAGCAAG
NOP53 guide RNA	GCAATGTAGTGGATCTGATAAGG
NOP53gRNA-R	TATCAGATCCACTACATTGCGATCATTTATCTTTCACTGCG
NOP53gRNA-F	GCAATGTAGTGGATCTGATAGTTTTAGAGCTAGAAATAGCAAG
Donor DNA primers:
TAP42 Donor F	ATGGCGTCAGTAACAGAACA
TAP42 Donor R	GCTAAGCTGAGGGTTATAACG
SEC9 Donor F	AGAAGTCCCTTAGCAAACCC
SEC9 Donor R	ATGAACCACTGTTGCTGCTG
CBK1 Donor F	GTTCAGAAGAAAGACACCGG
CBK1 Donor R	ATCCACAACCATTGTTTGCC
BUD4 Donor F	AGCGTATAACTGAACCAAGG
BUD4 Donor R	GTTCCCATATCCGGAAATTC
IZH3 Donor F	TCAAAATTCGTTCCTCATCC
IZH3 Donor R	CTTCAATGAGGATTTCCGTC
BRE5 Donor F	CCACGGTTGAATACATCAGACC
BRE5 Donor R	AAGGCTTGTGGTTGACTAGTCC
MDM12 Donor F	GATTCAATTAGAGAGGAGGC
MDM12 Donor R	TTCTCACAATGGATATTCGC
PBP1 Donor F	ATATTCATATTGCAGAGGACAG
PBP1 Donor R	ATTTCTTCAACTCTTCAATCTGG
SIZ1 Donor F	GTCTTCCAATATGGCTGTCC
SIZ1 Donor R	TCGGGAGGATGAAGAAATGG
NOP53 Donor F	CTACAATCCCAACAATAAAGCTTG
NOP53 Donor R	CTCAATTCTTTCAACTCTTGTTGC
CRISPR checking primers
TAP42 chk F	GTCTACTGCTTCCATCAAGTC
SEC9 chk F	CCCTCTTTTATTGCTTCTGGTA
CBK1 chk F	ACATGGCTGAGTGTATTGTT
BUD4 chkF	TTCGAAGAAGATAAAATGACTCT
IZH3 chk F	CAGCCACTTTGGTGAAGTG
BRE5 chk F	AAATGGCTTAAGAGAAGAAAAAGTT
MDM12 chk F	TGAATTATCCCGTAGAAAAGTC
PBP1 chk F	CCTAATTCCAACAAGGGAAT
SIZ1 chk F	AGCTATATCAATTTGACATATTA
NOP53 chk F	AAGAAGAAGAAGAAGAGGAACAC
